# Supplementary material for: Three Approaches to Speech Retardation. Occasional Paper #8.
Source: Royal Society of Chemistry journal article supplement (doi:10.1039/d4ra00756e), 1971-05-01
Supplement: d4ra00756e1.pdf [file d4ra00756e1.pdf]

## Supporting Information

### **Switch-On Near Infrared Emission in Albumin Behind Dark Fabric: Toward Application in Forensic Latent Bloodstain Detection**

*Matthew A. Saucier<sup>1</sup>, Nicholas A. Kruse<sup>1</sup>, Timothy A. Lewis<sup>1</sup>, Nathan I. Hammer<sup>1</sup>, Jared H. Delcamp<sup>1\*</sup>*

*<sup>1</sup>Department of Chemistry and Biochemistry, University of Mississippi, University, MI 38677, USA*

*\*Correspondence: [delcamp@olemiss.edu](mailto:delcamp@olemiss.edu)*

Table of Contents:

*Photophysical spectra:*

|                                                                                                                  |   |
|------------------------------------------------------------------------------------------------------------------|---|
| <b>Figure S1.</b> Raw emission spectrum of <b>SO3C7</b> in saline and HSA versus background noise.....           | 3 |
| <b>Figure S2.</b> Emission spectrum of <b>SO3C7</b> in saline and HSA on a silicon photodetector.....            | 3 |
| <b>Figure S3.</b> Emission spectrum of <b>SO3C7</b> in saline and HSA at different excitation wavelengths.....   | 4 |
| <b>Figure S4.</b> Absorption and emission spectra of <b>SO3C7</b> in different albumin-containing solutions..... | 4 |
| <b>Figure S5.</b> Transient absorption spectroscopy and lifetimes.....                                           | 5 |
| <b>Figure S6.</b> Emission stability studies in ambient lighting.....                                            | 6 |
| <b>Figure S7.</b> <b>SO3C7</b> in biologically relevant environments emission spectra.....                       | 6 |
| <b>Figure S8.</b> <b>SO3C7</b> Hill plot emission spectra.....                                                   | 7 |
| <b>Figure S9.</b> Structure of <b>SO3C5</b> .....                                                                | 7 |

*NIR photographs:*

|                                                                                                      |    |
|------------------------------------------------------------------------------------------------------|----|
| <b>Figure S10.</b> NIR photographs of <b>SO3SQ</b> and <b>SO3C7</b> with layers of Kimwipes.....     | 8  |
| <b>Figure S11.</b> NIR photographs of <b>SO3SQ</b> and <b>SO3C7</b> with layers of black fabric..... | 9  |
| <b>Figure S12.</b> NIR photographs of <b>SO3C7</b> in HSA with different exposure times.....         | 9  |
| <b>Figure S13.</b> Relative brightness and contrast graphs with added layers of fabric.....          | 10 |
| <b>Table S1.</b> Grayscale brightness values for the NIR photographs.....                            | 11 |
| <b>Figure S14.</b> Example NIR image signal and noise explanation.....                               | 11 |
| <b>Figure S15.</b> Raw image version of Figure 4 from main text.....                                 | 12 |
| <b>Table S2.</b> Comparison of <b>SO3C7</b> versus literature dye-albumin complexes.....             | 13 |

*Characterization (NMR) spectra:*

|                                                                                             |    |
|---------------------------------------------------------------------------------------------|----|
| <b>Figure S16.</b> <sup>1</sup> H NMR of <b>SO3C7</b> in CD <sub>3</sub> OD (400 MHz).....  | 14 |
| <b>Figure S17.</b> <sup>13</sup> C NMR of <b>SO3C7</b> in CD <sub>3</sub> OD (400 MHz)..... | 14 |

Photophysical spectra:

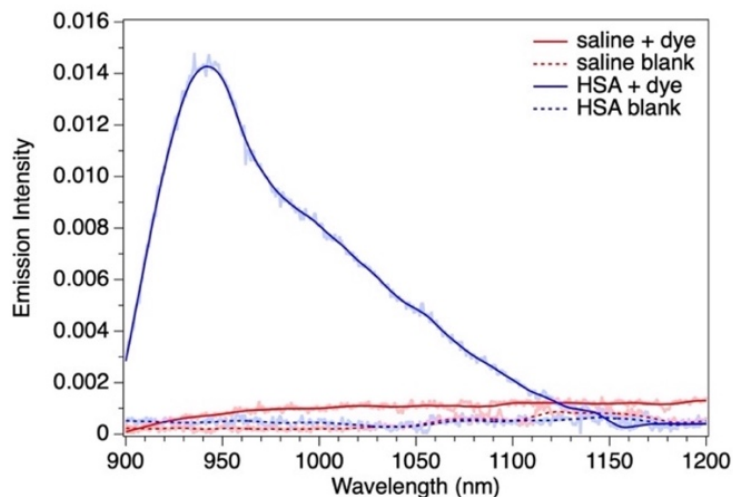

**Figure S1.** Raw emission spectrum of **SO<sub>3</sub>C7** in HSA and saline compared to background scan of a blank solution (solvent without dye), showing near background noise level emission from the dye in saline.

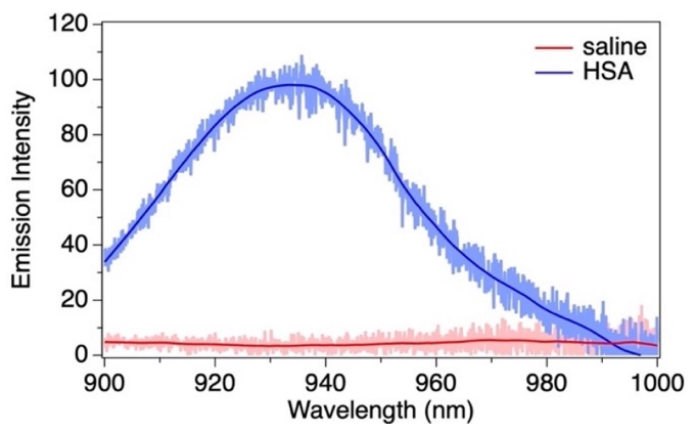

**Figure S2.** Emission spectrum of **SO<sub>3</sub>C7** in HSA and saline detected using a silicon CCD detector. Smoothed emission is the darker line in front of the lighter raw emission data.

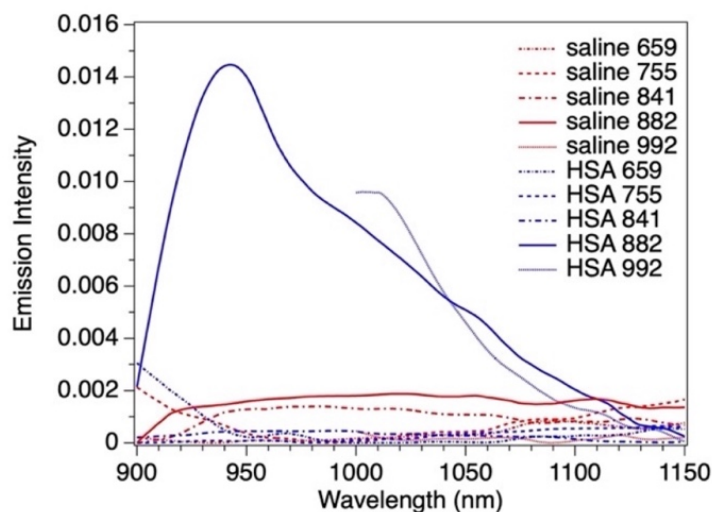

**Figure S3.** Emission spectrum of **SO3C7** in HSA and saline at different excitation wavelengths, showing no substantial emission from saline while the HSA sample is most emissive at wavelengths  $\geq 882$  nm.

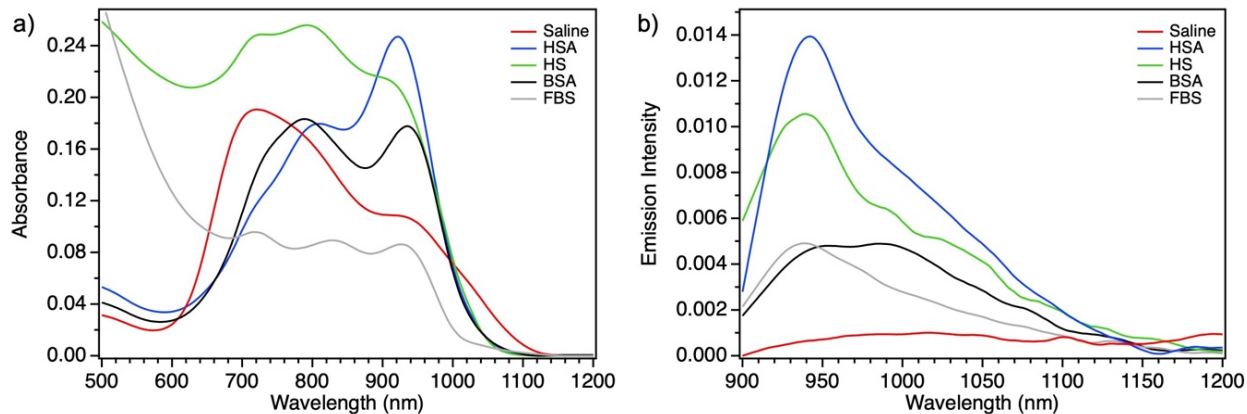

**Figure S4.** Absorption (a) and emission (b) of **SO3C7** in different albumin-containing solutions. HSA = human serum albumin, HS = human serum, BSA = bovine serum albumin, FBS = fetal bovine serum. All albumin sources diluted with 0.85%  $\text{NaCl}_{(\text{aq})}$  to similar albumin concentrations ( $\sim 6 \times 10^{-5}$  M) based on average albumin content of commercial serums. FBS was used as purchased due to the albumin content being  $\sim 4 \times 10^{-5}$  M.

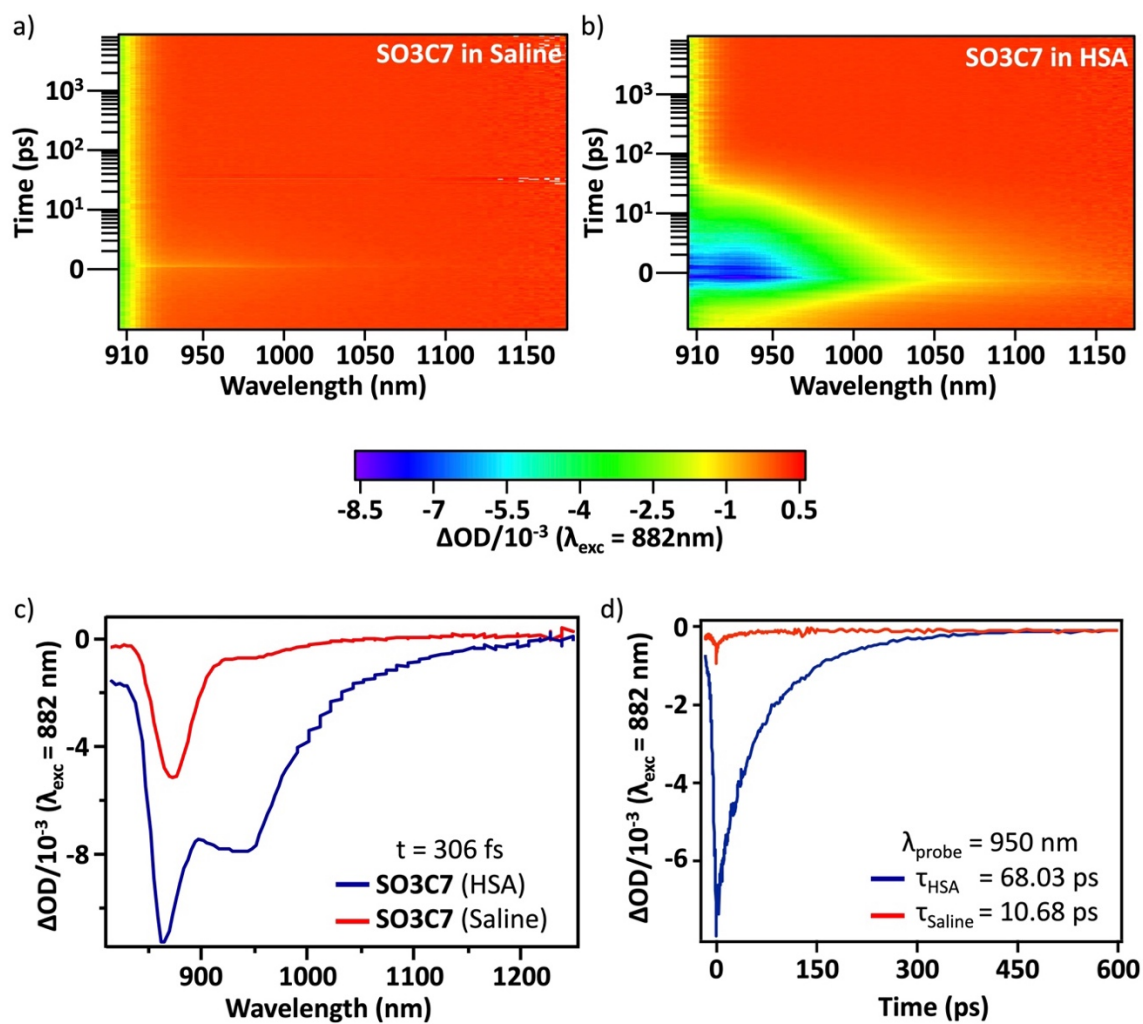

**Figure S5.** (a,b) Three-dimensional differential absorption spectra for **SO3C7** in saline and HSA. The excitation (pump) pulse was at 882 nm. (c,d) Comparisons between the stimulated emission of **SO3C7** in HSA and saline, isolated at the maximum signal in time (c) and wavelength (d).

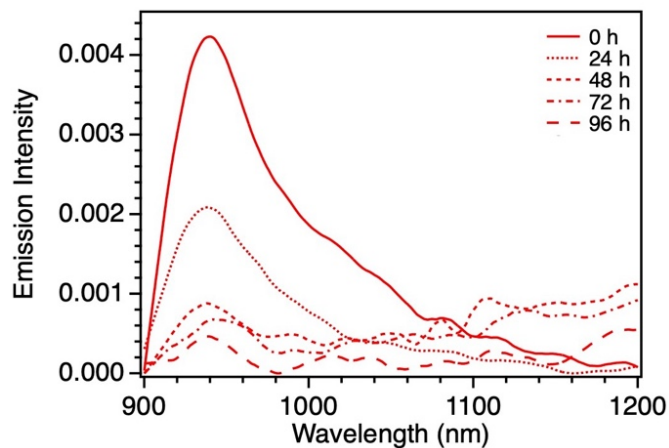

**Figure S6.** Emission spectra of SO3C7 in HSA kept in ambient light over 96 h.

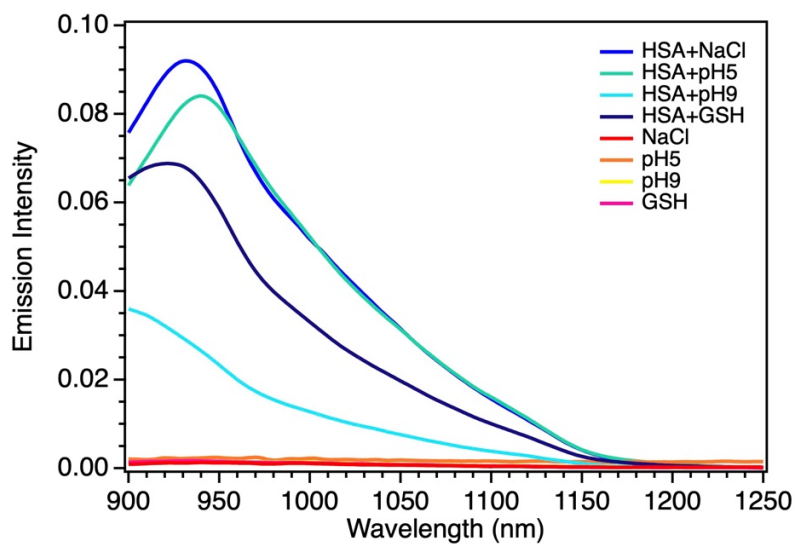

**Figure S7.** Emission spectra of SO3C7 with several biologically relevant environments (0.85% NaCl, 0.1 M pH 5, 0.1 M pH 9, and  $1 \times 10^{-4}$  M GSH) both in the presence of HSA and without HSA (used in Figure 3a). Samples irradiated with 850 nm excitation.

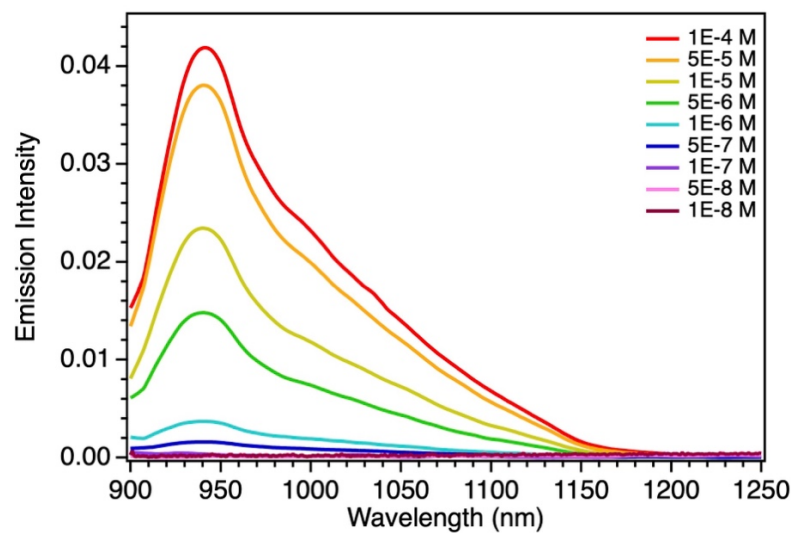

**Figure S8.** Emission spectra of **SO3C7** for Hill plot (Figure 3b) with different concentrations of HSA.

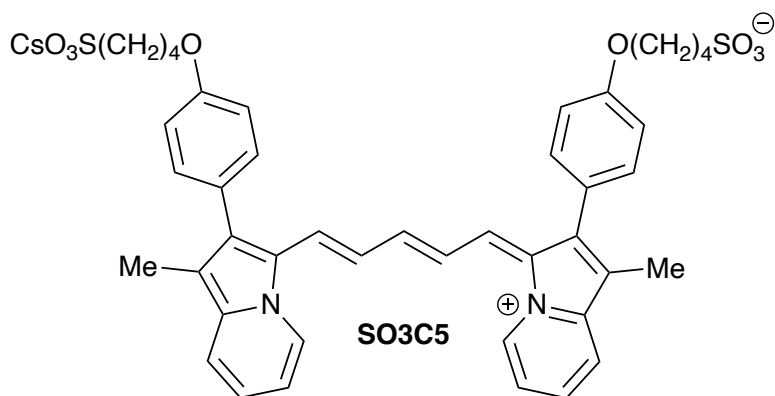

**Figure S9.** Structure of **SO3C5**.

NIR photographs:

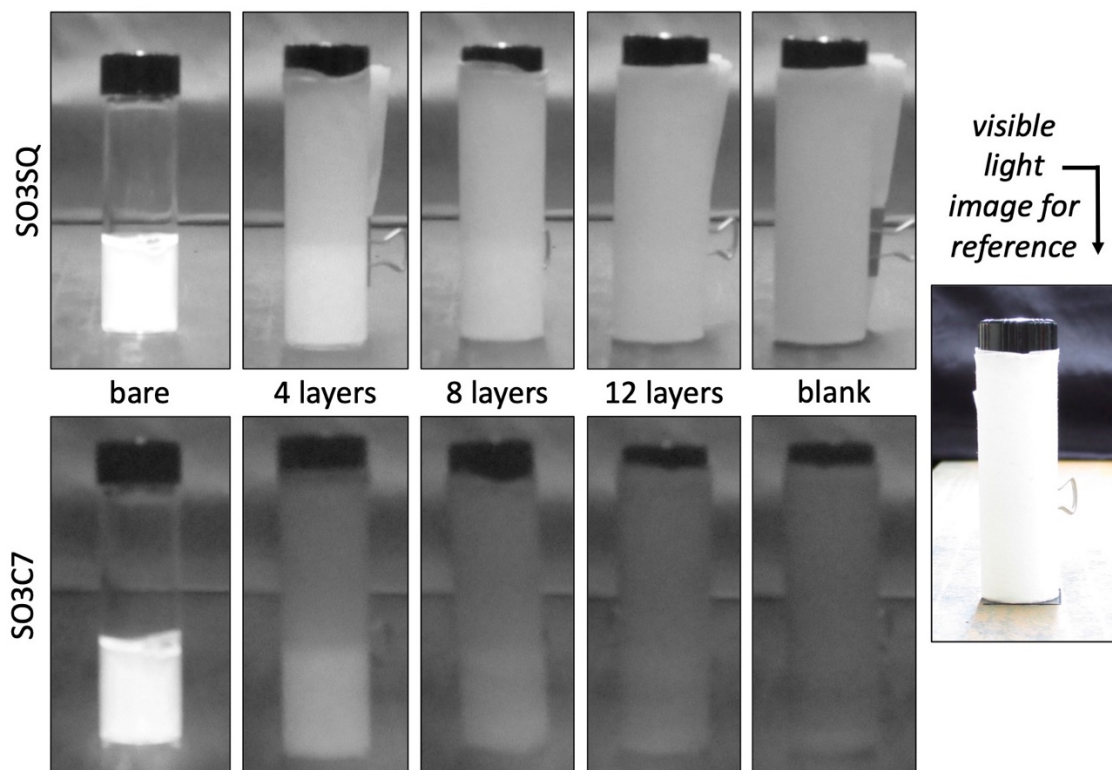

**Figure S10.** Grayscale NIR photographs of **SO3SQ** in HSA and **SO3C7** in HSA with layers of Kimwipes wrapped around the vial. Blank = water with no dye with the maximum number of layers around the vial to display a non-emissive reference.



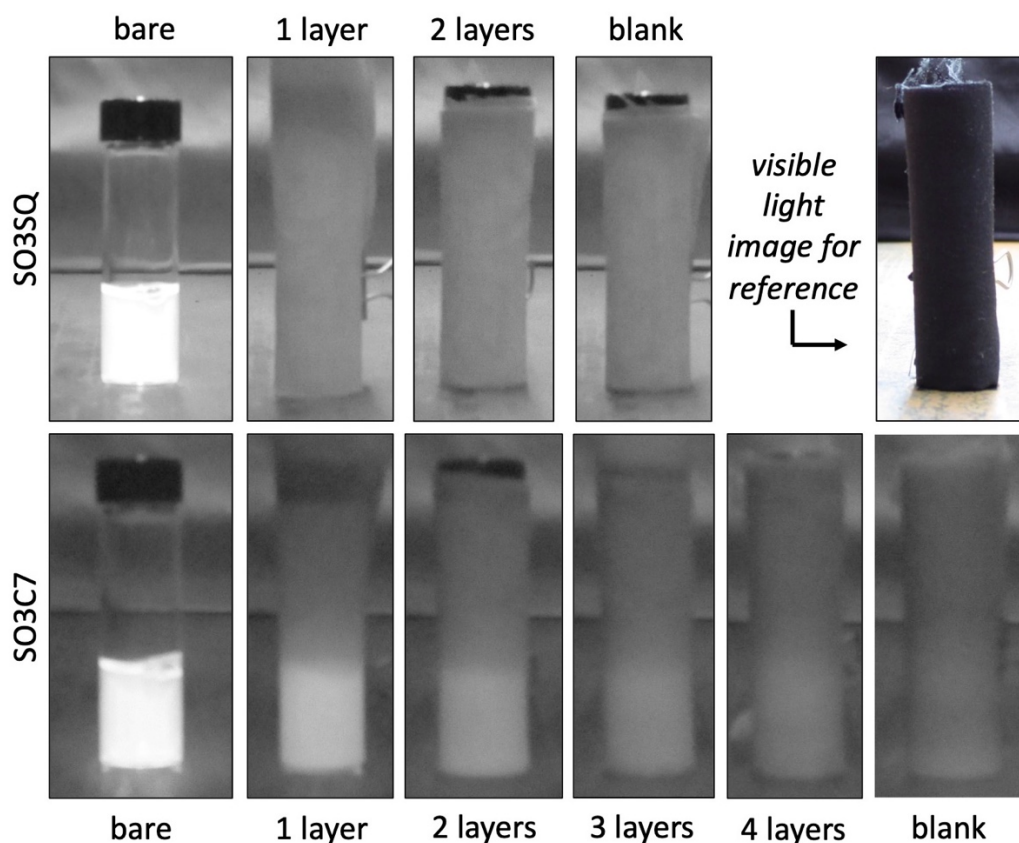

**Figure S11.** Grayscale NIR photographs of **SO3SQ** in HSA and **SO3C7** in HSA with layers of black fabric wrapped around the vial. Blank = water with no dye with the maximum number of layers around the vial to display a non-emissive reference.

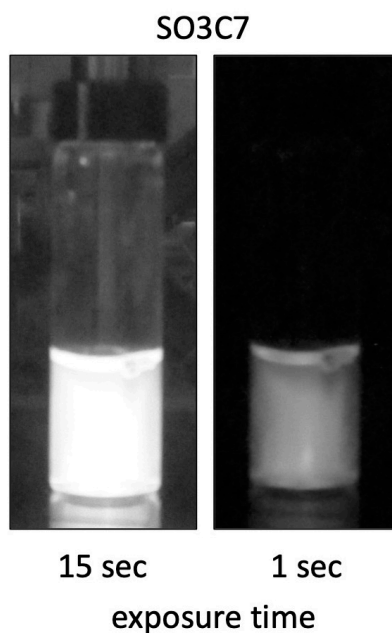

**Figure S12.** Grayscale NIR photographs of **SO3C7** in HSA with 15 seconds vs. 1 second exposure time. While dimmer, the emission is still captured with a short exposure time.

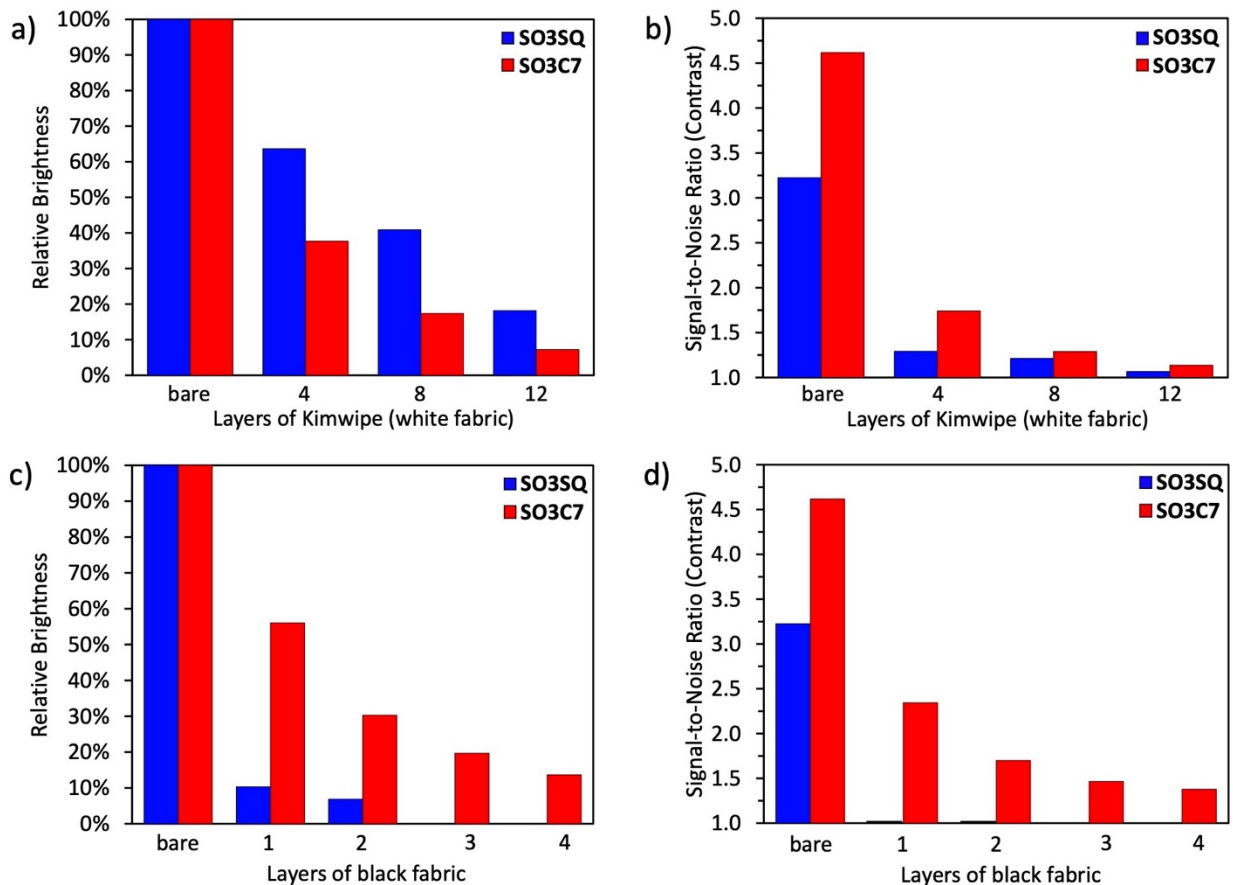

**Figure S13.** Relative brightness of **SO3SQ** in HSA versus **SO3C7** in HSA with a) white fabric (Kimwipe) or c) black fabric layers wrapped around the vial. The bare vial brightness value was set to 100% and the blank vial set to 0%. Note that the brightness was not determined for 3 and 4 layers for **SO3SQ** since those samples were not photographed. To determine contrast, that brightness value was compared to the background noise (darkest point above the emissive area of each vial) to produce a signal-to-noise ratio (brightness of emissive area divided by the brightness of the background) for **SO3SQ** in HSA versus **SO3C7** in HSA with b) white fabric (Kimwipe) or d) black fabric layers wrapped around the vial (see Figure S14). A signal-to-noise value of 1.00 equates to no difference in brightness of the emissive area compared to the background (entire vial is uniform in brightness). The blank sample in each case was very near this value. See Table S1 for full data table.

**Table S1.** Grayscale brightness values for the NIR photographs of **SO3SQ** and **SO3C7** used in the relative brightness (% bright.) and signal-to-noise ratio (SNR) graphs in Figure S13. Brightness was determined by taking the eyedropper tool in Microsoft PowerPoint at a point in the middle of the emissive area for each image (see Figure S14), then the grayscale slider was used to obtain the brightness value. Note that the brightness was not determined for 3 and 4 layers for **SO3SQ** since those samples were not photographed.

|                          | bare | layers of Kimwipe |      |      |       | layers of black fabric |      |      |      |       |
|--------------------------|------|-------------------|------|------|-------|------------------------|------|------|------|-------|
|                          |      | 4                 | 8    | 12   | blank | 1                      | 2    | 3    | 4    | blank |
| <b>SO3SQ</b><br>(signal) | 100  | 84                | 74   | 64   | 56    | 48                     | 46   | –    | –    | 42    |
| <b>SO3SQ</b><br>(noise)  | 31   | 65                | 61   | 60   | 58    | 48                     | 46   | –    | –    | 43    |
| %<br>bright.             | 100% | 64%               | 41%  | 18%  | 0%    | 10%                    | 7%   | –    | –    | 0%    |
| SNR                      | 3.23 | 1.29              | 1.21 | 1.07 | 0.97  | 1.00                   | 1.00 | –    | –    | 0.97  |
| <b>SO3C7</b><br>(signal) | 97   | 54                | 40   | 33   | 28    | 68                     | 51   | 44   | 40   | 34    |
| <b>SO3C7</b><br>(noise)  | 21   | 31                | 31   | 29   | 29    | 29                     | 30   | 30   | 29   | 28    |
| %<br>bright.             | 100% | 38%               | 17%  | 7%   | 0%    | 56%                    | 30%  | 20%  | 14%  | 0%    |
| SNR                      | 4.62 | 1.74              | 1.29 | 1.14 | 0.97  | 4.62                   | 2.34 | 1.70 | 1.47 | 1.38  |

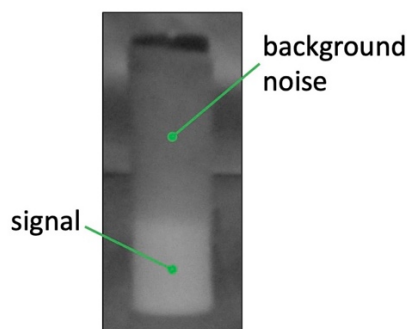

**Figure S14.** Visual explanation of an example NIR image noting where the source of signal and background noise comes from.

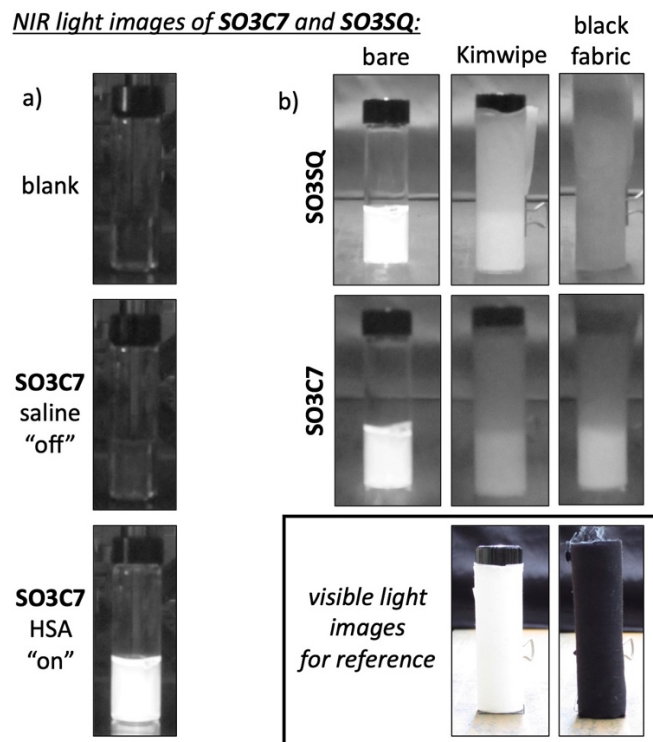

**Figure S15.** Grayscale version of Figure 4 from the main text.

**Table S2.** Comparison of **SO3C7** versus previously published dye-albumin complexes with emission enhancement. See main text for reference numbers.

| dye            | albumin source | $\lambda_{\max}^{\text{emis}}$<br>(nm) | comparison to <b>SO3C7</b>                                                                                                                        | ref.             |
|----------------|----------------|----------------------------------------|---------------------------------------------------------------------------------------------------------------------------------------------------|------------------|
| <b>SO3C7</b>   | human & bovine | 942                                    | –                                                                                                                                                 | <i>this work</i> |
| <b>SO3SQ</b>   | human & bovine | 722                                    | outside of forensic window                                                                                                                        | 11,12            |
| <b>SO3C5</b>   | human & bovine | 830                                    | outside of forensic window                                                                                                                        | 11,12            |
| ICG            | human & bovine | 827                                    | outside of forensic window, emission does not switch-off when not in presence of albumin, no selectivity of human albumin (HSA) over bovine (BSA) | 11,12, 19,20     |
| FD-1080        | bovine         | 1080                                   | outside of forensic window, did not use human albumin (HSA)                                                                                       | 14               |
| TPE-MI         | human          | 470                                    | outside of forensic window                                                                                                                        | 9                |
| <b>Cm-Np-B</b> | human & bovine | 460                                    | outside of forensic window, no discussion of human/bovine selectivity                                                                             | 22               |
| <b>3</b>       | bovine         | 538                                    | outside of forensic window, did not use human albumin (HSA)                                                                                       | 15               |
| CH-4T          | human & bovine | 1055                                   | outside of forensic window, more selective for bovine albumin (BSA), requires 70 °C heating for optimal emission response                         | 16               |
| CF1065         | bovine         | 1040                                   | outside of forensic window, did not use human albumin (HSA)                                                                                       | 17               |
| FM1210         | bovine         | 1100                                   | outside of forensic window, did not use human albumin (HSA)                                                                                       | 17               |
| KSQ-4          | bovine         | 817                                    | outside of forensic window, did not use human albumin (HSA)                                                                                       | 23               |
| SQ-1           | bovine         | 669                                    | outside of forensic window, did not use human albumin (HSA)                                                                                       | 24               |
| SQ-2           | bovine         | 684                                    | outside of forensic window, did not use human albumin (HSA)                                                                                       | 24               |
| VG1-C8         | bovine         | 661                                    | outside of forensic window, did not use human albumin (HSA)                                                                                       | 25               |
| VG10-C8        | bovine         | 686                                    | outside of forensic window, did not use human albumin (HSA)                                                                                       | 25               |
